# Supplementary material for: Pharmacologic Ascorbate and DNMT Inhibitors Increase DUOX Expression and Peroxide-Mediated Toxicity in Pancreatic Cancer
Source: MDPI journal article supplement (doi:10.3390/antiox12091683), 2023-08-29
Supplement: s1 [file s1]

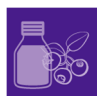

## Supplementary Materials:

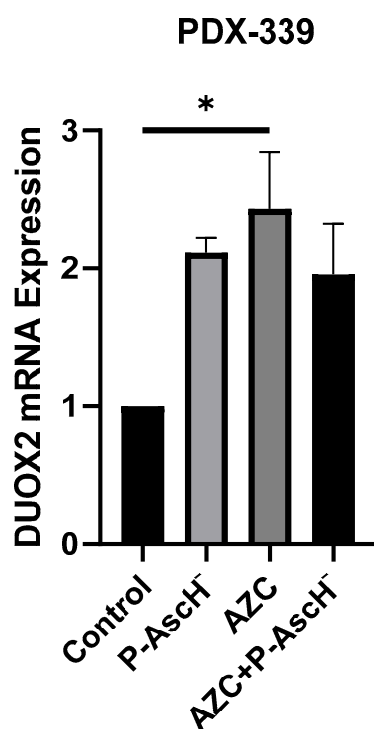

**Figure S1.** DUOX2 mRNA expression is increased after exposure to AZC (2  $\mu$ M) for 5 days and/or P-AsCH<sup>-</sup> (20 pmol/cell) for 1 hour in PDX-339 cells. The combination of AZC and P-AsCH<sup>-</sup> produces a similar increase in mRNA expression as AZC or P-AsCH<sup>-</sup> alone (means  $\pm$  SEM, values normalized to control;  $n = 6$ ; \* $p < 0.05$  vs. control).
